# Supplementary material for: The “L-Sandwich” Strategy for True Coronary Bifurcation Lesions: A Randomized Clinical Trial
Source: Hindawi journal article supplement (doi:10.1155/2023/6889836), 2023-03-21

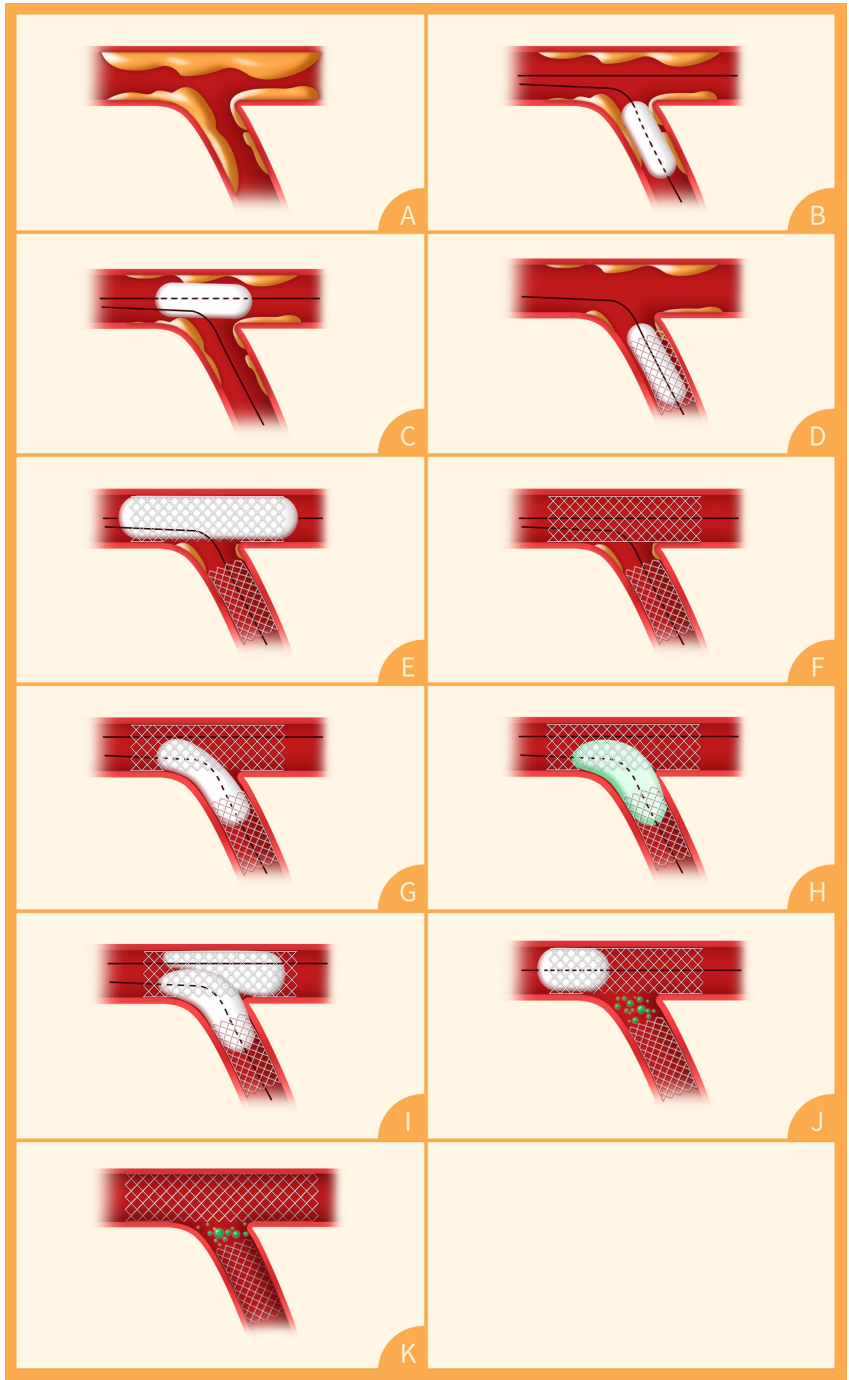

Supplement: f1 [file 6889836.f1.pdf]
